# Supplementary material for: The 18-kDa Translocator Protein Inhibits Vascular Cell Adhesion Molecule-1 Expression via Inhibition of Mitochondrial Reactive Oxygen Species
Source: PubMed Central journal article supplement — Mol Cells. 2015 Nov 25;38(12):1064–70. doi: 10.14348/molcells.2015.0165 (PMC4696997; doi:10.14348/molcells.2015.0165), 2015-11-25

Figure S1. The increased VACM-1 expression by TSPO gene silencing was inhibited by the treatment of Mito-TEMPO and cyclosporin A. (A) After 48 h of transfection with scrambled siRNA or TSPO-targeting siRNA (20 nM), cells were exposed to 250 nM PMA for 6 h. Mito-TEMPO (MT, 0.5  $\mu$ M) or cyclosporin A (CSA, 5  $\mu$ M) was pretreated for 1h before exposure of PMA. Down-regulation of TSPO using TSPO-specific siRNA was confirmed by anti-TSPO antibodies in western blots.  $\beta$ -actin was used as a loading control. (B) Densitometric analysis for Fig. S1A. Each bar represents mean  $\pm$  SEM (n = 3). \* $p$  < 0.05 vs. baseline value, # $p$  < 0.05 vs. control siRNA, \$ $p$  < 0.05 vs. PMA with siTSPO.

# Supplementary Figure 1

**A**

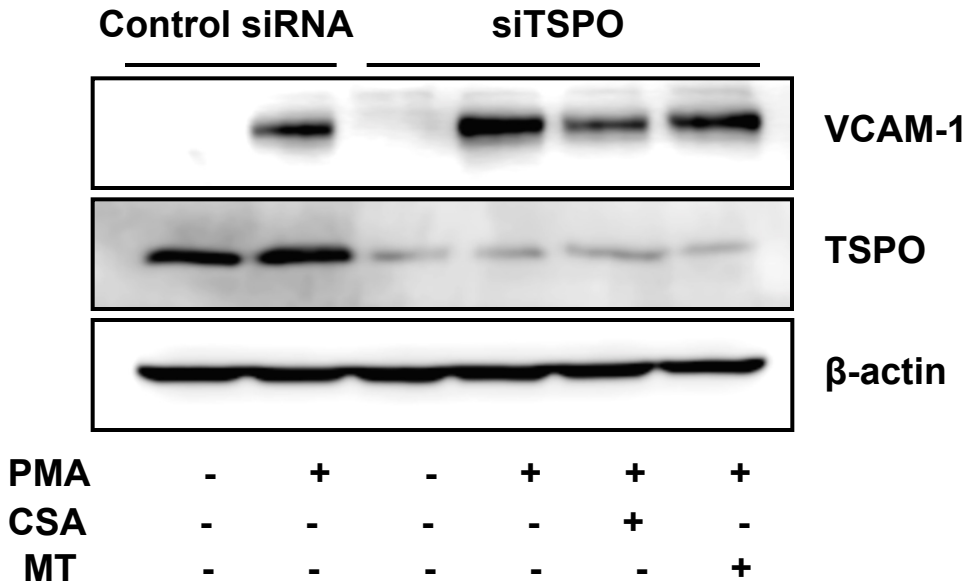

**B**

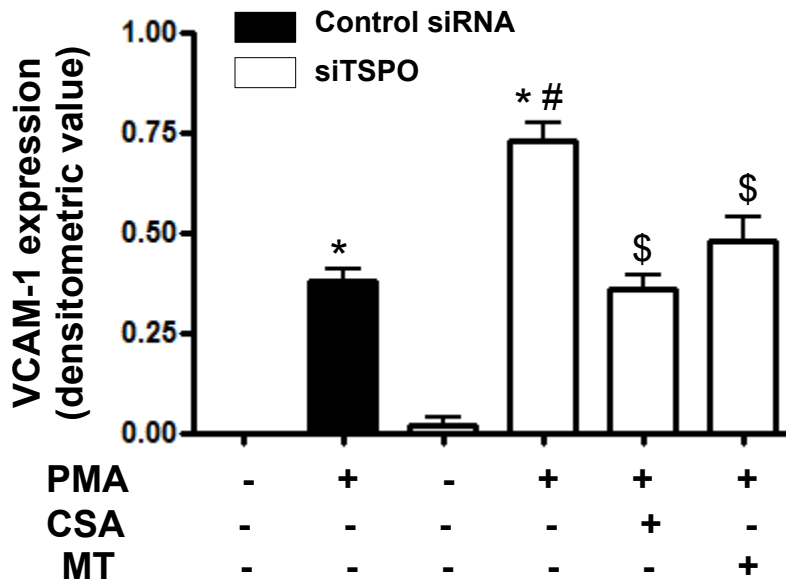

Supplement: molce-38-12-1064-supple.pdf [file molce-38-12-1064-supple.pdf]
